# Supplementary material for: Uncovering rate variation of lateral gene transfer during bacterial genome evolution
Source: PubMed Central journal article supplement (PMC2426709; doi:10.1186/1471-2164-9-235), 2008-05-20
Supplement: 1471-2164-9-235-S1.pdf [file 1471-2164-9-235-S1.pdf]

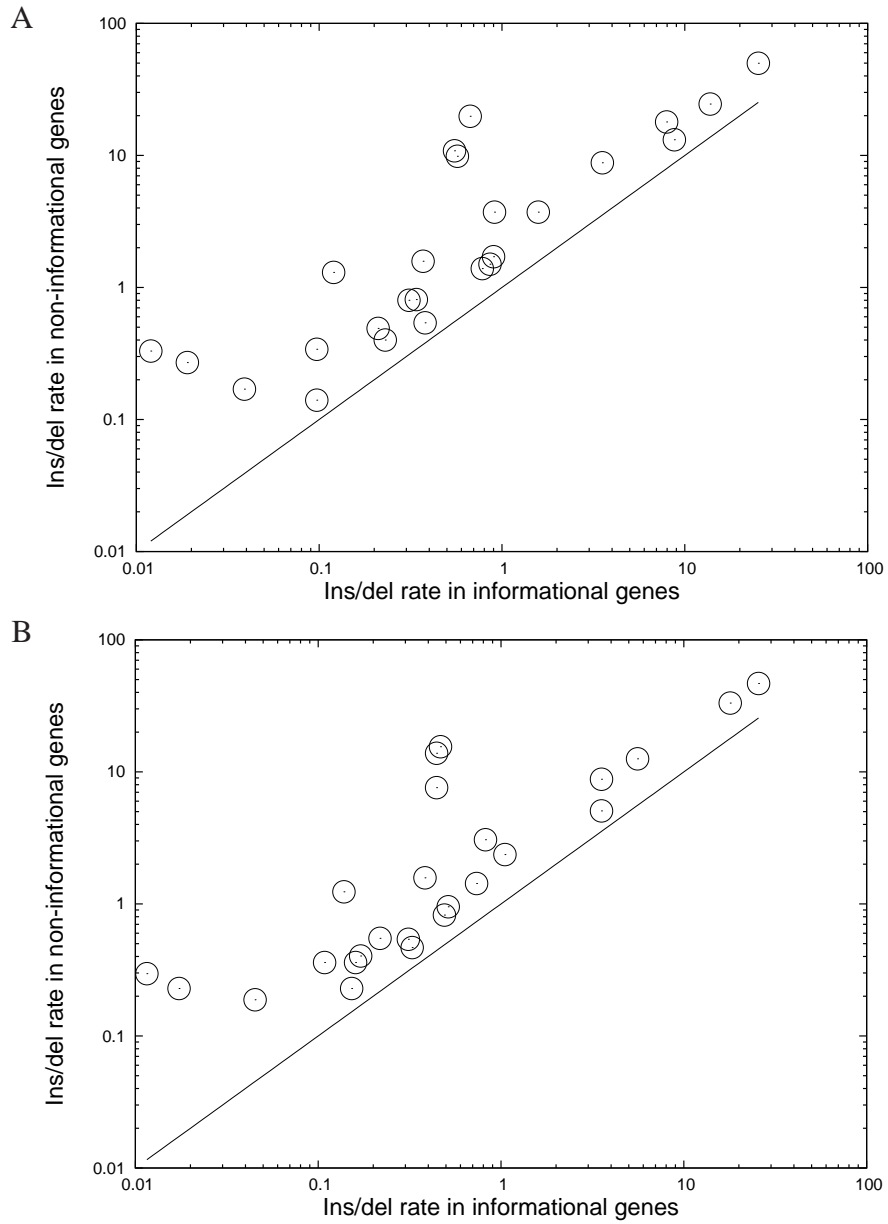

Figure S.1: Different ins/del rates between informational genes and non-informational genes. A, estimation was based on the select-genes trees; B, estimation was based on the common-genes trees. Only constant rates with no rate variation are shown, and the  $y = x$  line is also shown.
