# Supplementary material for: Uncovering rate variation of lateral gene transfer during bacterial genome evolution
Source: PubMed Central journal article supplement (PMC2426709; doi:10.1186/1471-2164-9-235), 2008-05-20
Supplement: 1471-2164-9-235-S2.pdf [file 1471-2164-9-235-S2.pdf]

Table S.1: Insertion/deletion rates of non-informative genes in different phylogenetic groups estimated with rate variation. Estimation was based on the select-genes trees. All the informational genes were excluded from the estimation.

| Group                   | Taxa | Genome Size | Length   | Rate Variation |        |              | Constant Rate |              | $\Delta\text{Ln}L$ |
|-------------------------|------|-------------|----------|----------------|--------|--------------|---------------|--------------|--------------------|
|                         |      |             |          | $\alpha$ value | MLE    | $\text{Ln}L$ | MLE           | $\text{Ln}L$ |                    |
| <i>Bacillus</i>         | 13   | 4.9         | 0.126886 | 0.39           | 6.41   | -37382       | 0.54          | -37602       | 220*               |
| <i>Brucella</i>         | 4    | 2.1         | 0.000775 | 0.057          | 95.94  | -1070        | 24.51         | -1108        | 38*                |
| <i>Burkholderia</i>     | 7    | 3.8         | 0.028971 | 0.37           | 25.58  | -16005       | 3.72          | -16401       | 396*               |
| <i>Candidatus</i>       | 4    | 1.3         | 0.608223 | $\infty$       | 0.40   | -3992        | 0.40          | -3992        | 0                  |
| <i>Chlamydomphila</i>   | 7    | 1.2         | 0.081640 | 0.54           | 0.41   | -1336        | 0.27          | -1354        | 18*                |
| <i>Clostridium</i>      | 5    | 3.3         | 0.123806 | 0.59           | 12.79  | -8557        | 10.85         | -8671        | 114*               |
| <i>Corynebacterium</i>  | 5    | 3.0         | 0.172207 | 1.01           | 1.94   | -7623        | 0.80          | -7670        | 47*                |
| <i>Ehrlichia</i>        | 5    | 1.5         | 0.059080 | $\infty$       | 0.32   | -789         | 0.33          | -789         | 0                  |
| <i>Escherichia</i>      | 7    | 5.0         | 0.002852 | 0.26           | 48.45  | -9565        | 13.16         | -10018       | 453*               |
| <i>Helicobacter</i>     | 5    | 1.7         | 0.232504 | 0.59           | 1.76   | -3634        | 1.30          | -3734        | 100*               |
| <i>Lactobacillus</i>    | 6    | 2.2         | 0.250368 | $\infty$       | 0.49   | -8374        | 0.49          | -8374        | 0                  |
| <i>Mycobacterium</i>    | 6    | 4.2         | 0.070373 | 0.49           | 18.13  | -13338       | 1.72          | -13367       | 29*                |
| <i>Mycoplasma</i>       | 12   | 0.9         | 0.441286 | $\infty$       | 0.094  | -7234        | 0.094         | -7234        | 0                  |
| <i>Prochlorococcus</i>  | 5    | 1.9         | 0.356990 | 3.05           | 0.18   | -4171        | 0.17          | -4175        | 4*                 |
| <i>Pseudomonas</i>      | 8    | 6.3         | 0.057175 | 2.16           | 1.65   | -25143       | 1.39          | -25244       | 101*               |
| <i>Rhodopseudomonas</i> | 4    | 5.3         | 0.060450 | 0.70           | 2.60   | -8638        | 1.5           | -8706        | 68*                |
| <i>Rickettsia</i>       | 5    | 1.3         | 0.055962 | 0.44           | 3.70   | -2862        | 1.58          | -2962        | 100*               |
| <i>Salmonella</i>       | 5    | 4.8         | 0.002930 | 0.44           | 13.30  | -4851        | 8.79          | -4915        | 64*                |
| <i>Shigella</i>         | 6    | 4.6         | 0.003188 | 0.39           | 43.74  | -8884        | 17.91         | -9145        | 261*               |
| <i>Staphylococcus</i>   | 13   | 2.8         | 0.034391 | 0.097          | 285.34 | -10129       | 19.76         | -12626       | 2497*              |
| <i>Streptococcus</i>    | 19   | 2.0         | 0.041459 | 0.37           | 12.57  | -21785       | 9.85          | -23595       | 1810*              |
| <i>Synechococcus</i>    | 5    | 2.6         | 0.364362 | $\infty$       | 0.34   | -6884        | 0.34          | -6881        | 0                  |
| <i>Vibrio</i>           | 5    | 3.2         | 0.104170 | 0.23           | 10.94  | -7867        | 0.81          | -8111        | 244*               |
| <i>Xanthomonas</i>      | 6    | 5.1         | 0.024790 | 0.37           | 16.33  | -8878        | 3.54          | -9153        | 275*               |
| <i>Yersinia</i>         | 6    | 4.6         | 0.000263 | 0.070          | 271.98 | -2954        | 49.81         | -3282        | 328*               |

\*Significant improvement
