# Supplementary material for: Uncovering rate variation of lateral gene transfer during bacterial genome evolution
Source: PubMed Central journal article supplement (PMC2426709; doi:10.1186/1471-2164-9-235), 2008-05-20
Supplement: 1471-2164-9-235-S3.pdf [file 1471-2164-9-235-S3.pdf]

Table S.2: Insertion/deletion rates between informational genes and noninformational genes in COG classification. Estimation was based on the select-genes trees.

| Group                   | Informational Genes |        |              |               |              |                    | Non-informational Genes <sup>a</sup> |        |              |               |              |                    |
|-------------------------|---------------------|--------|--------------|---------------|--------------|--------------------|--------------------------------------|--------|--------------|---------------|--------------|--------------------|
|                         | Rate Variation      |        |              | Constant Rate |              | $\Delta\text{Ln}L$ | Rate Variation                       |        |              | Constant Rate |              | $\Delta\text{Ln}L$ |
|                         | $\alpha$ value      | MLE    | $\text{Ln}L$ | MLE           | $\text{Ln}L$ |                    | $\alpha$ value                       | MLE    | $\text{Ln}L$ | MLE           | $\text{Ln}L$ |                    |
| <i>Bacillus</i>         | 0.25                | 2.88   | -2757        | 0.38          | -2917        | 160*               | 0.56                                 | 1.17   | -12717       | 0.47          | -13034       | 317*               |
| <i>Brucella</i>         | 0.083               | 73.94  | -139         | 13.62         | -142         | 3*                 | 0.025                                | 91.11  | -628         | 16.17         | -649         | 21*                |
| <i>Burkholderia</i>     | 0.23                | 9.92   | -1207        | 1.58          | -1259        | 52*                | 0.47                                 | 4.12   | -5319        | 1.65          | -5413        | 94*                |
| <i>Candidatus</i>       | $\infty$            | 0.23   | -629         | 0.23          | -629         | 0                  | $\infty$                             | 0.38   | -2713        | 0.38          | -2713        | 0                  |
| <i>Chlamydomphila</i>   | 0.022               | 0.031  | -47          | 0.021         | -47          | 0                  | 0.069                                | 0.082  | -219         | 0.045         | -220         | 1                  |
| <i>Clostridium</i>      | 0.19                | 8.25   | -911         | 0.55          | -983         | 72*                | 0.47                                 | 7.33   | -4401        | 1.30          | -4596        | 195*               |
| <i>Corynebacterium</i>  | 0.17                | 4.06   | -839         | 0.31          | -862         | 23*                | 0.68                                 | 1.20   | -3444        | 0.49          | -3488        | 44*                |
| <i>Ehrlichia</i>        | $\infty$            | 0.015  | -15          | 0.015         | -15          | 0                  | $\infty$                             | 0.012  | -37          | 0.012         | -37          | 0                  |
| <i>Escherichia</i>      | 0.14                | 51.45  | -1109        | 9.21          | -1206        | 97*                | 0.13                                 | 21.91  | -3655        | 5.57          | -3876        | 221*               |
| <i>Helicobacter</i>     | 0.056               | 4.46   | -269         | 0.11          | -322         | 53*                | 0.39                                 | 0.83   | -1579        | 0.28          | -1643        | 64*                |
| <i>Lactobacillus</i>    | 0.39                | 0.42   | -842         | 0.21          | -873         | 31*                | 1.91                                 | 0.46   | -3814        | 0.37          | -3828        | 14*                |
| <i>Mycobacterium</i>    | 8.84                | 5.18   | -1309        | 0.90          | -1310        | 1                  | 4.10                                 | 4.08   | -5287        | 1.14          | -5292        | 5*                 |
| <i>Mycoplasma</i>       | 1.94                | 0.08   | -1016        | 0.07          | -1021        | 5*                 | 4.96                                 | 0.11   | -2424        | 0.10          | -2427        | 3*                 |
| <i>Prochlorococcus</i>  | 1.00                | 0.042  | -193         | 0.039         | -194         | 1                  | 0.66                                 | 0.11   | -1329        | 0.084         | -1340        | 11*                |
| <i>Pseudomonas</i>      | 0.43                | 1.34   | -1855        | 0.75          | -1927        | 72*                | 0.73                                 | 1.28   | -10159       | 0.88          | -10386       | 227*               |
| <i>Rhodopseudomonas</i> | 0.14                | 7.40   | -679         | 0.86          | -707         | 28*                | 0.328                                | 1.94   | -3379        | 0.86          | -3437        | 58*                |
| <i>Rickettsia</i>       | 0.14                | 0.94   | -269         | 0.37          | -282         | 13*                | 0.22                                 | 1.38   | -1001        | 0.55          | -1038        | 37*                |
| <i>Salmonella</i>       | 0.12                | 6.33   | -395         | 3.72          | -408         | 13*                | 0.23                                 | 5.47   | -1851        | 3.72          | -1876        | 25*                |
| <i>Shigella</i>         | 0.18                | 22.30  | -827         | 7.96          | -869         | 42*                | 0.27                                 | 22.94  | -4055        | 9.83          | -4208        | 153*               |
| <i>Staphylococcus</i>   | 0.040               | 206.07 | -1230        | 0.67          | -1687        | 457*               | 0.10                                 | 8.03   | -3157        | 0.47          | -3602        | 445*               |
| <i>Streptococcus</i>    | 0.15                | 7.82   | -1909        | 0.58          | -2213        | 304*               | 0.38                                 | 3.40   | -6446        | 0.79          | -6725        | 279*               |
| <i>Synechococcus</i>    | $\infty$            | 0.097  | -376         | 0.097         | -376         | 0                  | $\infty$                             | 0.19   | -2433        | 0.19          | -2433        | 0                  |
| <i>Vibrio</i>           | 0.11                | 5.01   | -713         | 0.34          | -722         | 9*                 | 0.70                                 | 0.79   | -3809        | 0.49          | -3833        | 24*                |
| <i>Xanthomonas</i>      | 0.080               | 19.84  | -453         | 0.95          | -491         | 38*                | 0.16                                 | 8.49   | -2196        | 1.23          | -2280        | 84*                |
| <i>Yersinia</i>         | 0.025               | 171.72 | -269         | 25.63         | -309         | 40*                | 0.031                                | 152.33 | -1278        | 23.63         | -1404        | 126*               |

<sup>a</sup>Genes not in COG classification were excluded

\*Significant improvement
