# Supplementary material for: Uncovering rate variation of lateral gene transfer during bacterial genome evolution
Source: PubMed Central journal article supplement (PMC2426709; doi:10.1186/1471-2164-9-235), 2008-05-20
Supplement: 1471-2164-9-235-S4.pdf [file 1471-2164-9-235-S4.pdf]

Table S.3: Information on phylogeny construction using different methods.

| Group                   | Number of genes (characters) used in analysis |            |        |            |                        | Supported By Supertree |
|-------------------------|-----------------------------------------------|------------|--------|------------|------------------------|------------------------|
|                         | Select                                        |            | Common |            | Supertree <sup>a</sup> |                        |
|                         | Gene                                          | Characters | Gene   | Characters | Genes                  |                        |
| <i>Bacillus</i>         | 7                                             | 9231       | 386    | 396175     | 3407                   | Common                 |
| <i>Brucella</i>         | 10                                            | 12576      | 591    | 669428     | 591                    | Common                 |
| <i>Burkholderia</i>     | 11                                            | 16755      | 634    | 679984     | 2126                   | Common                 |
| <i>Candidatus</i>       | 9                                             | 11553      | 134    | 167530     | -                      |                        |
| <i>Chlamydomphila</i>   | 16                                            | 24405      | 637    | 738291     | -                      |                        |
| <i>Clostridium</i>      | 11                                            | 15216      | 309    | 338459     | 1141                   | Common                 |
| <i>Corynebacterium</i>  | 16                                            | 24546      | 578    | 724565     | -                      |                        |
| <i>Ehrlichia</i>        | 15                                            | 21306      | 517    | 577079     | -                      |                        |
| <i>Escherichia</i>      | 14                                            | 20556      | 1700   | 1673111    | 2980                   | Select                 |
| <i>Helicobacter</i>     | 14                                            | 20613      | 584    | 650282     | -                      |                        |
| <i>Lactobacillus</i>    | 13                                            | 19326      | 339    | 376764     | 923                    | Neither                |
| <i>Mycobacterium</i>    | 13                                            | 20751      | 607    | 679689     | -                      |                        |
| <i>Mycoplasma</i>       | 9                                             | 12780      | 79     | 108760     | 433                    | Neither                |
| <i>Prochlorococcus</i>  | 14                                            | 21993      | 617    | 706435     | -                      |                        |
| <i>Pseudomonas</i>      | 16                                            | 23553      | 579    | 660179     | 3102                   | Neither                |
| <i>Rhodopseudomonas</i> | 13                                            | 19371      | 1140   | 1237551    | -                      |                        |
| <i>Rickettsia</i>       | 15                                            | 20736      | 266    | 326738     | -                      |                        |
| <i>Salmonella</i>       | 16                                            | 23118      | 1580   | 1570712    | -                      |                        |
| <i>Shigella</i>         | 13                                            | 19155      | 1476   | 1459347    | 2608                   | Common                 |
| <i>Staphylococcus</i>   | 13                                            | 17559      | 565    | 596478     | 1902                   | Select                 |
| <i>Streptococcus</i>    | 12                                            | 17961      | 400    | 431646     | 1690                   | Neither                |
| <i>Synechococcus</i>    | 15                                            | 21090      | 630    | 735413     | -                      |                        |
| <i>Vibrio</i>           | 13                                            | 19386      | 971    | 1036551    | 1780                   | Common                 |
| <i>Xanthomonas</i>      | 5                                             | 5235       | 321    | 377134     | -                      |                        |
| <i>Yersinia</i>         | 14                                            | 23118      | 1260   | 1308476    | 2752                   | Neither                |

<sup>a</sup>If the select-genes tree is topologically identical to the common-genes tree, a supertree was not constructed.
