# Supplementary material for: Uncovering rate variation of lateral gene transfer during bacterial genome evolution
Source: PubMed Central journal article supplement (PMC2426709; doi:10.1186/1471-2164-9-235), 2008-05-20
Supplement: 1471-2164-9-235-S5.pdf [file 1471-2164-9-235-S5.pdf]

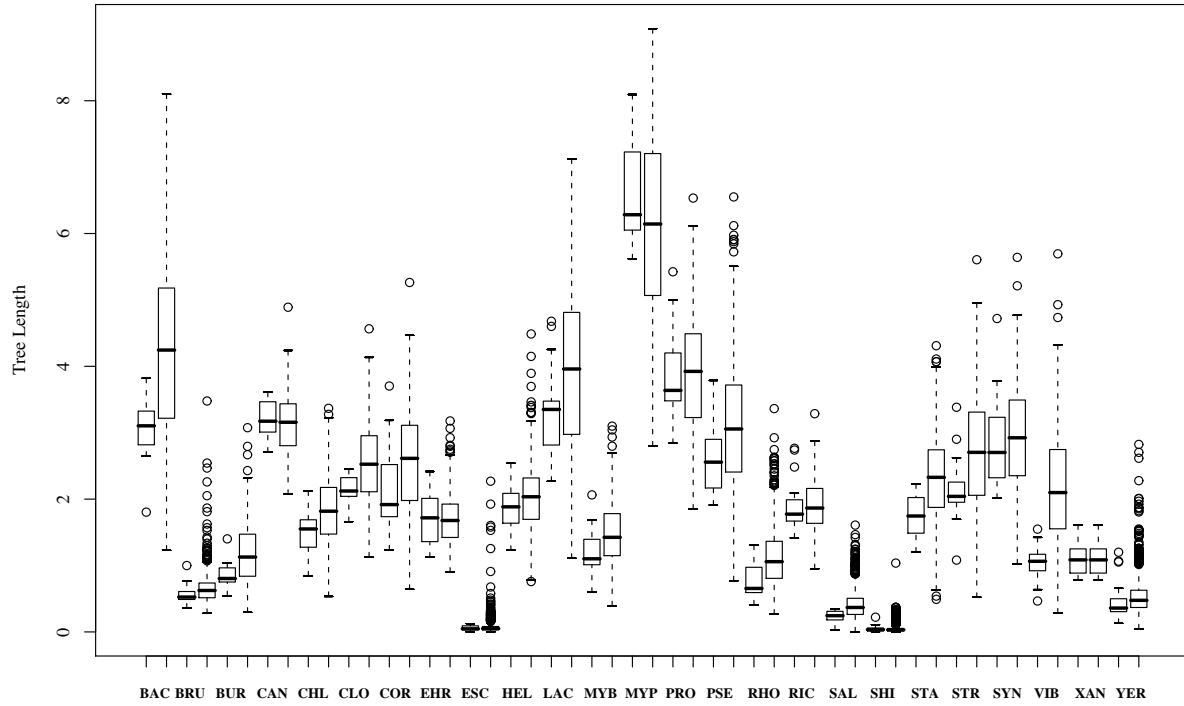

Figure S.2: Boxplot of tree length of the select-genes tree and the common-genes tree from each group. Group names are shown in the first three letters (except MYB for *Mycobacterium*, MYP for *Mycoplasma*. For each group, tree length of the select-genes tree is on the left, and that of the common-genes tree is on the right.)
