# Supplementary material for: Uncovering rate variation of lateral gene transfer during bacterial genome evolution
Source: PubMed Central journal article supplement (PMC2426709; doi:10.1186/1471-2164-9-235), 2008-05-20
Supplement: 1471-2164-9-235-S7.pdf [file 1471-2164-9-235-S7.pdf]

Table S.5: Alpha values based on different phylogenies. Estimation are based on possible alternative phylogenies for the selected genes, which are sorted from 1 to 10 as from best supported to lest supported.

| Group                   | $\alpha$ in overall genes |          |          |          |          |          |          |          |          |          | $\alpha$ in Non-informational genes |          |          |          |          |          |          |          |          |          |
|-------------------------|---------------------------|----------|----------|----------|----------|----------|----------|----------|----------|----------|-------------------------------------|----------|----------|----------|----------|----------|----------|----------|----------|----------|
|                         | 1                         | 2        | 3        | 4        | 5        | 6        | 7        | 8        | 9        | 10       | 1                                   | 2        | 3        | 4        | 5        | 6        | 7        | 8        | 9        | 10       |
| <i>Bacillus</i>         | 0.39                      | 0.37     | 0.33     | -        | -        | -        | -        | -        | -        | -        | 0.39                                | 0.41     | 0.39     | -        | -        | -        | -        | -        | -        | -        |
| <i>Brucella</i>         | 0.050                     | 0.042    | 0.035    | 1.28     | -        | -        | -        | -        | -        | -        | 0.053                               | 0.044    | 0.042    | 1.34     | -        | -        | -        | -        | -        | -        |
| <i>Burkholderia</i>     | 0.35                      | -        | -        | -        | -        | -        | -        | -        | -        | -        | 0.37                                | -        | -        | -        | -        | -        | -        | -        | -        | -        |
| <i>Candidatus</i>       | $\infty$                  | -        | -        | -        | -        | -        | -        | -        | -        | -        | $\infty$                            | -        | -        | -        | -        | -        | -        | -        | -        | -        |
| <i>Chlamydomphila</i>   | 0.41                      | 0.41     | 0.39     | 0.41     | 0.39     | -        | -        | -        | -        | -        | 0.56                                | 0.53     | 0.53     | 0.56     | 0.53     | -        | -        | -        | -        | -        |
| <i>Clostridium</i>      | 0.50                      | -        | -        | -        | -        | -        | -        | -        | -        | -        | 0.59                                | -        | -        | -        | -        | -        | -        | -        | -        | -        |
| <i>Corynebacterium</i>  | 1.06                      | 0.50     | -        | -        | -        | -        | -        | -        | -        | -        | 1.34                                | 0.63     | -        | -        | -        | -        | -        | -        | -        | -        |
| <i>Ehrlichia</i>        | $\infty$                  | -        | -        | -        | -        | -        | -        | -        | -        | -        | $\infty$                            | -        | -        | -        | -        | -        | -        | -        | -        | -        |
| <i>Escherichia</i>      | 0.23                      | 0.18     | 0.18     | -        | -        | -        | -        | -        | -        | -        | 0.26                                | 0.19     | 0.19     | -        | -        | -        | -        | -        | -        | -        |
| <i>Helicobacter</i>     | 0.47                      | -        | -        | -        | -        | -        | -        | -        | -        | -        | 0.59                                | -        | -        | -        | -        | -        | -        | -        | -        | -        |
| <i>Lactobacillus</i>    | $\infty$                  | -        | -        | -        | -        | -        | -        | -        | -        | -        | $\infty$                            | -        | -        | -        | -        | -        | -        | -        | -        | -        |
| <i>Mycobacterium</i>    | 0.41                      | 0.35     | 0.23     | -        | -        | -        | -        | -        | -        | -        | 0.49                                | 0.39     | 0.24     | -        | -        | -        | -        | -        | -        | -        |
| <i>Mycoplasma</i>       | $\infty$                  | $\infty$ | $\infty$ | $\infty$ | $\infty$ | $\infty$ | $\infty$ | $\infty$ | $\infty$ | $\infty$ | $\infty$                            | $\infty$ | $\infty$ | $\infty$ | $\infty$ | $\infty$ | $\infty$ | $\infty$ | $\infty$ | $\infty$ |
| <i>Prochlorococcus</i>  | 2.42                      | -        | -        | -        | -        | -        | -        | -        | -        | -        | 3.05                                | -        | -        | -        | -        | -        | -        | -        | -        | -        |
| <i>Pseudomonas</i>      | 1.70                      | 1.60     | 1.51     | 1.51     | 1.51     | 1.51     | 1.51     | 1.51     | -        | -        | 2.28                                | 1.91     | 1.91     | 1.91     | 1.91     | 1.91     | 1.91     | 1.80     | -        | -        |
| <i>Rhodopseudomonas</i> | 0.59                      | -        | -        | -        | -        | -        | -        | -        | -        | -        | 0.70                                | -        | -        | -        | -        | -        | -        | -        | -        | -        |
| <i>Rickettsia</i>       | 0.33                      | -        | -        | -        | -        | -        | -        | -        | -        | -        | 0.44                                | -        | -        | -        | -        | -        | -        | -        | -        | -        |
| <i>Salmonella</i>       | 0.37                      | 0.37     | 0.37     | -        | -        | -        | -        | -        | -        | -        | 0.41                                | 0.44     | 0.44     | -        | -        | -        | -        | -        | -        | -        |
| <i>Shigella</i>         | 0.35                      | 0.39     | -        | -        | -        | -        | -        | -        | -        | -        | 0.37                                | 0.41     | -        | -        | -        | -        | -        | -        | -        | -        |
| <i>Staphylococcus</i>   | 0.095                     | 0.085    | 0.090    | 0.090    | 0.090    | 0.085    | 0.090    | -        | -        | -        | 0.099                               | 0.095    | 0.095    | 0.090    | 0.090    | 0.090    | 0.085    | -        | -        | -        |
| <i>Streptococcus</i>    | 0.37                      | 0.33     | 0.33     | 0.35     | 0.33     | 0.35     | 0.33     | 0.35     | 0.33     | 0.35     | 0.39                                | 0.37     | 0.37     | 0.39     | 0.39     | 0.37     | 0.37     | 0.37     | 0.37     | 0.37     |
| <i>Synechococcus</i>    | $\infty$                  | -        | -        | -        | -        | -        | -        | -        | -        | -        | $\infty$                            | -        | -        | -        | -        | -        | -        | -        | -        | -        |
| <i>Vibrio</i>           | 0.21                      | -        | -        | -        | -        | -        | -        | -        | -        | -        | 0.23                                | -        | -        | -        | -        | -        | -        | -        | -        | -        |
| <i>Xanthomonas</i>      | 0.33                      | -        | -        | -        | -        | -        | -        | -        | -        | -        | 0.37                                | -        | -        | -        | -        | -        | -        | -        | -        | -        |
| <i>Yersinia</i>         | 0.063                     | 0.063    | 0.067    | -        | -        | -        | -        | -        | -        | -        | 0.071                               | 0.067    | 0.071    | -        | -        | -        | -        | -        | -        | -        |
