# Supplementary material for: Uncovering rate variation of lateral gene transfer during bacterial genome evolution
Source: PubMed Central journal article supplement (PMC2426709; doi:10.1186/1471-2164-9-235), 2008-05-20
Supplement: 1471-2164-9-235-S8.pdf [file 1471-2164-9-235-S8.pdf]

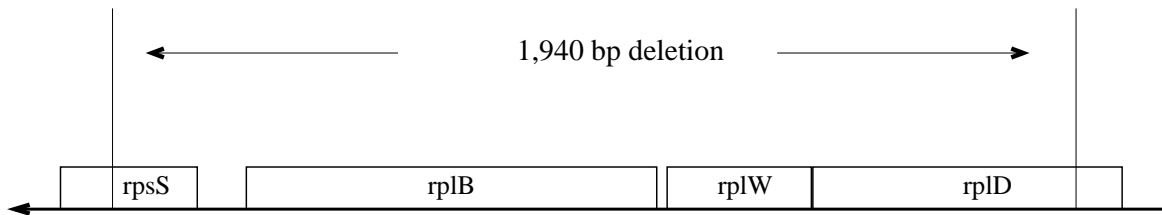

Figure S.3: The deletion of ribosomal proteins in *Streptococcus mutans* UA159 (GenBank accession: AE014133).
