# Supplementary material for: Uncovering rate variation of lateral gene transfer during bacterial genome evolution
Source: PubMed Central journal article supplement (PMC2426709; doi:10.1186/1471-2164-9-235), 2008-05-20
Supplement: 1471-2164-9-235-S9.pdf [file 1471-2164-9-235-S9.pdf]

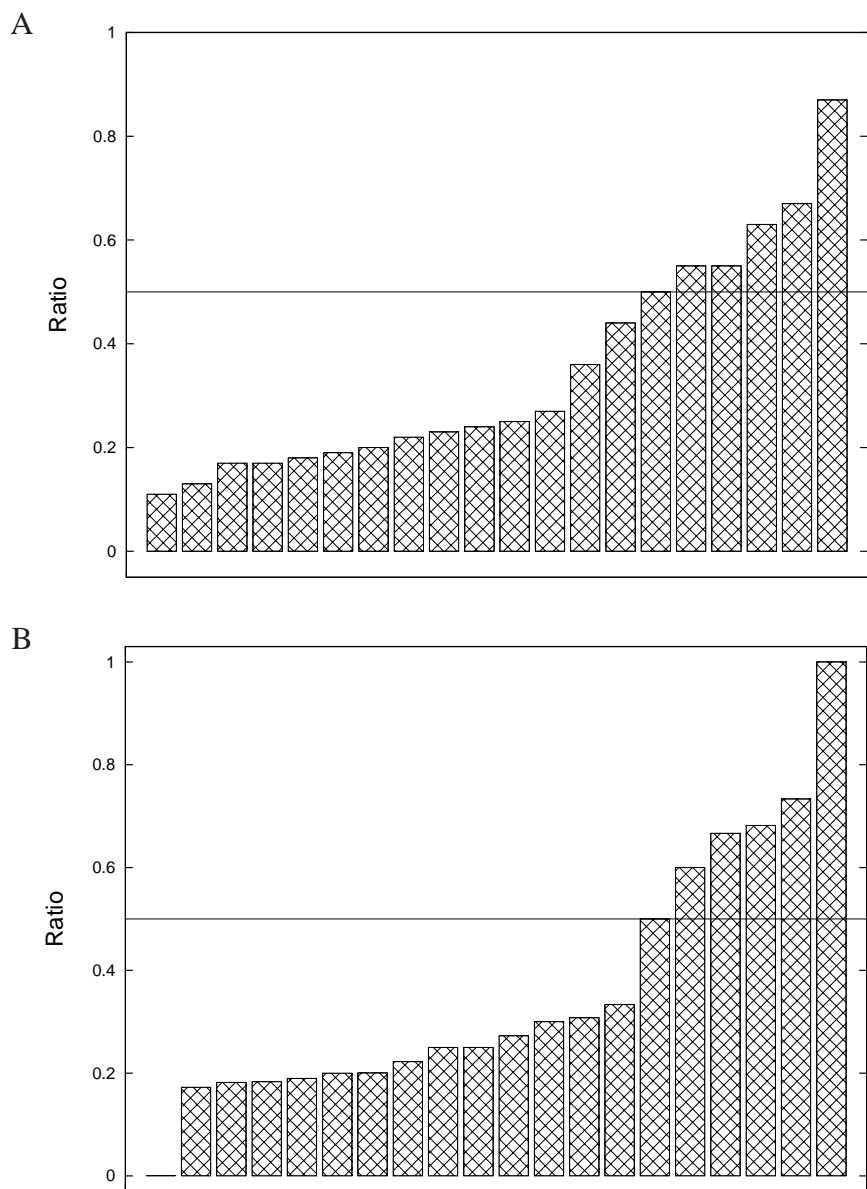

Figure S.4: Small  $\alpha$  change after excluding informational genes compared with excluding the most conserved genes. A, Estimation was based on the select-genes trees; B, Estimation was based on the common-genes trees. Each bar represents a group and all groups were sorted according to their ratios. The ratios are from Table 4.
